# Supplementary material
Source: ML conference proceedings conference paper supplement (https://openreview.net/forum?id=Ebzo6s2xtv)
Supplement: supplementary_material [file attachment]

# Supplementary Materials: D<sup>3</sup>U-Net: Dual-Domain Collaborative Optimization Deep Unfolding Network for Image Compressive Sensing

Anonymous Authors

## 1 Overview

In this supplementary material, we present additional experimental results and visual analysis not included in our main manuscript due to space limitations. Moreover, the structure of the RFF block within the WDM is depicted in Fig. 2. The RFF block is employed to refine the information from the previous stage, which can extract essential features and eliminate redundant information. It facilitates inter-stage information exchange and enhances the reconstruction capabilities of the current stage in effect.

## 2 More Experimental Details and Analysis

This section presents additional comparative results that highlight the performance of our proposed method, D<sup>3</sup>U-Net, against other superior methods. Table 1 provides the average PSNR/SSIM comparisons across different sampling rates for our D<sup>3</sup>U-Net and other advanced methods on various benchmark datasets. For example, our D<sup>3</sup>U-Net outperforms AMP-Net [8], COAST-Net [6], ISTA-Net++ [5], MADUN [1], DPUNet [4], DPC-DUN [2], SODAS-Net [3] by 1.86 dB, 2.52 dB, 4.89 dB, 3.77 dB, 2.01 dB, 1.61 dB, 1.97 dB, and 2.56 dB in terms of PSNR on General100 dataset when the CS sampling ratio is 10%, respectively. In addition, the average SSIM gain of our method over these comparison methods is 0.0233, 0.0469, 0.1031, 0.0728, 0.0382, 0.0162, 0.0342, and 0.0456, respectively. As shown in Fig. 1 and Fig. 4, visual comparisons are conducted on three natural benchmark images named “foreman” from Set14, and “bird”, “head” from Set5 at a 10% CS sampling ratio, which can be seen that our method can recover much clearer edges and textures than other methods. Compared to COAST-Net [6], ISTA-Net++ [5], MADUN [1], and AMP-Net [8], our method achieved improvements of 2.41 dB, 1.49 dB, 2.12 dB, and 2.65 dB in terms of PSNR on the benchmark image named “foreman” from Set14 when the CS sampling ratio is 10%, respectively.

## 3 The Visual Analysis of Dual-main Information

In this section, we further analyze the impact of dual-domain information, where the visual analysis of the feature maps provides a deeper insight. The visual maps in Fig. 3 illustrate that our Image Domain Mapping (IDM) and Wavelet Domain Mapping (WDM) blocks focus on different aspects of information and are mutually complementary. As shown in Fig. 3, the color change from blue to red shows a shift in attention levels, in which cooler blues indicate less attention. Conversely, the transition to a warm red represents a significant increase in attention, denoting improved levels of cognitive engagement. The sub-figure 3a highlights the regions of interest for the difference block, while sub-figure 3b identifies the areas of concern for the consistency block. And sub-figure 3c illustrates the areas of concern by only utilizing wavelet domain

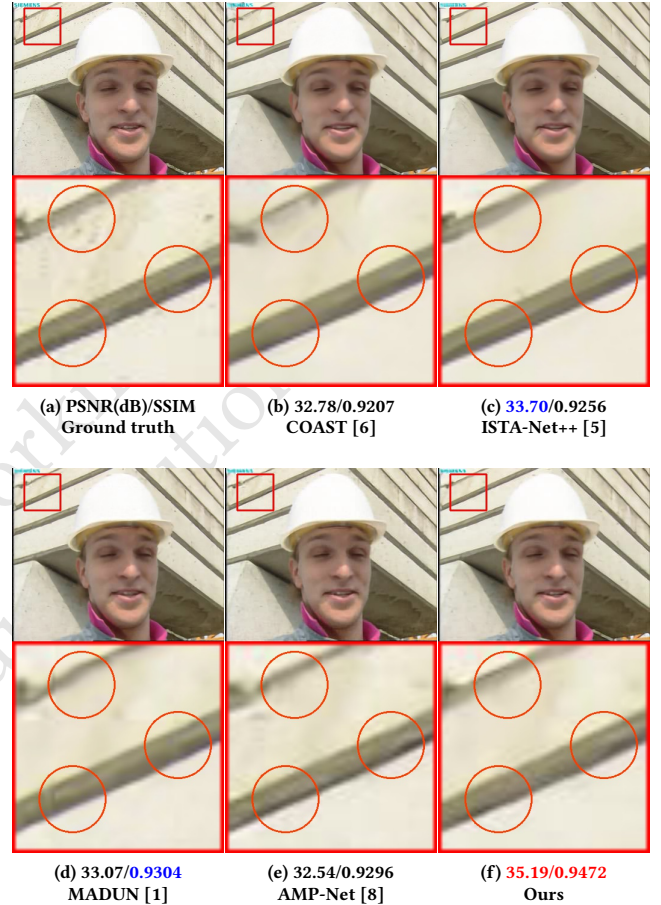

Figure 1: Visual quality comparisons between our MTADUN and recently state-of-the-art CS methods on Set14 at 10% CS sampling ratio. The best and second-best results are highlighted in red and blue, respectively.

information, which focuses on preserving more details and edges. In contrast, sub-figure 3d depicts the areas of concern only using image domain information, which pays more attention to smooth regions. They indicate that information from different domains can be complementary to each other. The final sub-figure 3e shows that our D<sup>3</sup>U-Net is capable of focusing on a broader range of information, demonstrating enhanced sensitivity to details with increased fidelity. This indicates that introducing information from different domains contributes to recovering superior images.

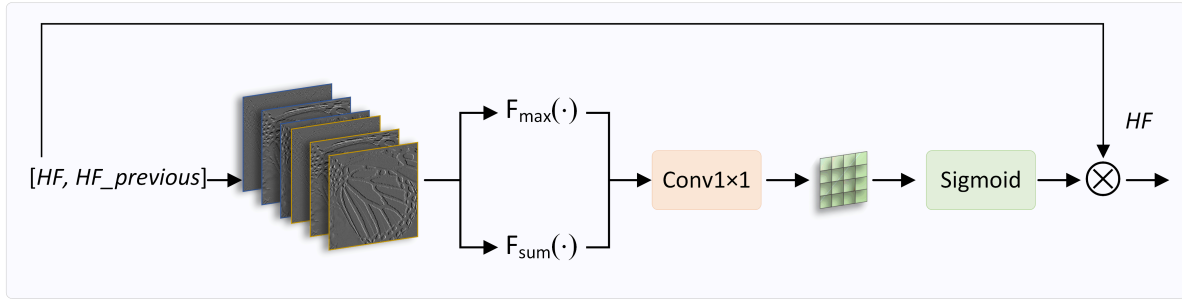

Figure 2: The structure of the RFF block.

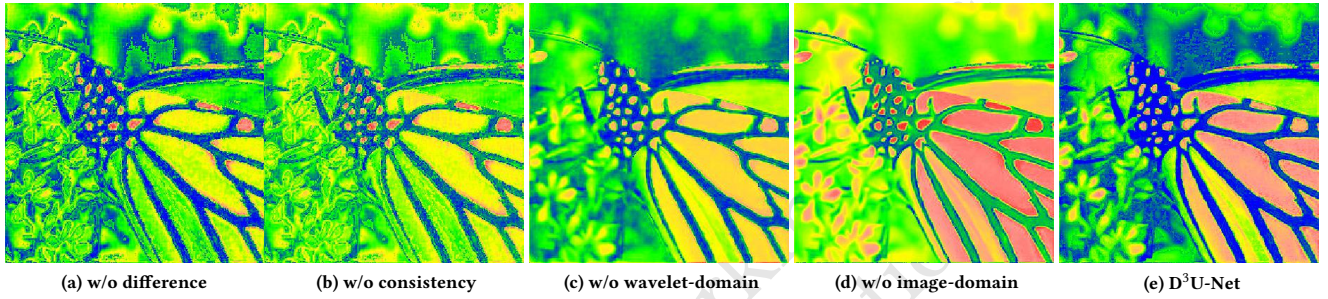

Figure 3: Visual analysis of feature maps at the ninth stage of our  $D^3U$ -Net. It shows that introducing dual-domain information enables the network to pay more high-fidelity attention to details. The color change from blue to red shows a shift in attention levels, in which cooler blues indicate less attention. Conversely, the transition to a warm red represents a significant increase in attention, denoting improved levels of cognitive engagement.

Table 1: Average PSNR(dB)/SSIM comparisons with different methods. The best and second-best results are highlighted in bold and underlined, respectively.

| Dataset    | Method         | Sampling Rate       |                     |                     |                     |                     |
|------------|----------------|---------------------|---------------------|---------------------|---------------------|---------------------|
|            |                | 10%                 | 20%                 | 30%                 | 40%                 | 50%                 |
| Set14      | AMP-Net [8]    | 28.69/0.8171        | 31.95/0.8933        | 34.27/0.9293        | 36.26/0.9505        | 38.10/0.9647        |
|            | COAST [6]      | 27.41/0.7799        | 30.71/0.8672        | 33.10/0.9106        | 35.12/0.9369        | 36.93/0.9549        |
|            | ISTA-Net [7]   | 25.85/0.7214        | 28.91/0.8289        | 31.37/0.8868        | 33.48/0.9221        | 35.60/0.9450        |
|            | ISTA-Net++ [5] | 26.75/0.7549        | 30.09/0.8518        | 32.40/0.8999        | 34.26/0.9287        | 35.90/0.9477        |
|            | MADUN [1]      | 27.97/0.7914        | 31.50/0.8790        | 34.05/0.9194        | 36.05/0.9439        | 37.96/0.9592        |
|            | DPUNet [4]     | 28.49/0.8226        | 31.61/0.8963        | 33.95/0.9308        | 35.93/0.9505        | 37.66/0.9628        |
|            | DPC-DUN [2]    | 28.02/0.7947        | 31.37/0.8781        | 33.92/0.9188        | 35.91/0.9429        | 37.83/0.9592        |
|            | SODAS-Net [3]  | 27.54/0.7812        | 30.32/0.8624        | 33.62/0.9163        | 35.72/0.9415        | 37.61/0.9581        |
|            | <b>Ours</b>    | <b>29.75/0.8419</b> | <b>33.07/0.9096</b> | <b>35.52/0.9403</b> | <b>37.49/0.9580</b> | <b>39.50/0.9699</b> |
| General100 | AMP-Net [8]    | 31.28/0.8825        | 35.29/0.9401        | 38.02/0.9645        | 40.11/0.9771        | 41.96/0.9848        |
|            | COAST [6]      | 30.62/0.8589        | 34.39/0.9238        | 36.91/0.9520        | 39.04/0.9681        | 40.95/0.9783        |
|            | ISTA-Net [7]   | 28.25/0.8027        | 31.94/0.8920        | 34.90/0.9350        | 37.25/0.9572        | 39.36/0.9716        |
|            | ISTA-Net++ [5] | 29.37/0.8330        | 33.14/0.9110        | 35.69/0.9443        | 37.74/0.9626        | 39.44/0.9736        |
|            | MADUN [1]      | 31.13/0.8676        | 35.15/0.9329        | 37.86/0.9594        | 40.08/0.9735        | 42.18/0.9821        |
|            | DPUNet [4]     | 31.53/0.8896        | 35.41/0.9430        | 38.04/0.9650        | 40.16/0.9767        | 41.94/0.9836        |
|            | DPC-DUN [2]    | 31.17/0.8716        | 34.98/0.9321        | 37.76/0.9590        | 39.95/0.9731        | 42.01/0.9820        |
|            | SODAS-Net [3]  | 30.58/0.8602        | 34.10/0.9224        | 37.49/0.9576        | 39.74/0.9722        | 41.74/0.9813        |
|            | <b>Ours</b>    | <b>33.14/0.9058</b> | <b>36.99/0.9522</b> | <b>39.71/0.9716</b> | <b>41.91/0.9818</b> | <b>44.22/0.9885</b> |

| GT                                                                                 | COAST[6]                                                                           | ISTA-Net++[5]                                                                      | MADUN[1]                                                                           | DPUNet[4]                                                                           | AMP-Net[8]                                                                           | Ours                                                                                 |
|------------------------------------------------------------------------------------|------------------------------------------------------------------------------------|------------------------------------------------------------------------------------|------------------------------------------------------------------------------------|-------------------------------------------------------------------------------------|--------------------------------------------------------------------------------------|--------------------------------------------------------------------------------------|
| 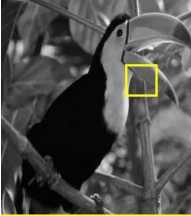  |   |   |   |   |   |   |
|   |   |   |   |   |   |   |
| PSNR(dB)/SSIM                                                                      | 34.07/0.9399                                                                       | 32.31/0.9098                                                                       | 35.06/0.9509                                                                       | 34.92/0.9566                                                                        | 35.11/0.9535                                                                         | 37.53/0.9716                                                                         |
|   |   |   |   |   |   |   |
|  |  |  |  |  |  |  |
| PSNR(dB)/SSIM                                                                      | 30.93/0.7660                                                                       | 30.44/0.7443                                                                       | 30.99/0.7731                                                                       | 32.17/0.8089                                                                        | 32.09/0.7898                                                                         | 32.76/0.8258                                                                         |

Figure 4: Visual quality comparisons between our proposed method and recently state-of-the-art CS methods on Set5 at 10% CS sampling ratio. The best and second-best results are highlighted in red and blue, respectively.

## References

- [1] Jiechong Song, Bin Chen, and Jian Zhang. 2021. Memory-Augmented Deep Unfolding Network for Compressive Sensing. In *Proceedings of the 29th ACM International Conference on Multimedia*. 4249–4258.
- [2] Jiechong Song, Bin Chen, and Jian Zhang. 2023. Dynamic Path-Controllable Deep Unfolding Network for Compressive Sensing. *IEEE Transactions on Image Processing* 32 (2023), 2202–2214.
- [3] Jiechong Song and Jian Zhang. 2023. SODAS-Net: Side-Information-Aided Deep Adaptive Shrinkage Network for Compressive Sensing. *IEEE Transactions on Instrumentation and Measurement* 72 (2023), 1–12.
- [4] Yixiao Yang, Ran Tao, Kaixuan Wei, and Ying Fu. 2022. Dynamic proximal unrolling network for compressive imaging. *Neurocomputing* 510 (2022), 203–217.
- [5] Di You, Jingfen Xie, and Jian Zhang. 2021. ISTA-NET++: Flexible Deep Unfolding Network for Compressive Sensing. In *2021 IEEE International Conference on Multimedia and Expo (ICME)*. 1–6.
- [6] Di You, Jian Zhang, Jingfen Xie, Bin Chen, and Siwei Ma. 2021. COAST: Control-lable Arbitrary-Sampling NeTwork for Compressive Sensing. *IEEE Transactions on Image Processing* 30 (2021), 6066–6080.
- [7] Jian Zhang and Bernard Ghanem. 2018. ISTA-Net: Interpretable Optimization-Inspired Deep Network for Image Compressive Sensing. In *2018 IEEE/CVF Conference on Computer Vision and Pattern Recognition*. 1828–1837.
- [8] Zhonghao Zhang, Yipeng Liu, Jiani Liu, Fei Wen, and Ce Zhu. 2021. AMP-Net: Denoising-Based Deep Unfolding for Compressive Image Sensing. *IEEE Transactions on Image Processing* 30 (2021), 1487–1500.
